# Supplementary material
Source: publisher figshare collection journal article supplement (https://acs.figshare.com/ndownloader/files/14456345)
Supplement: Supplementary file 1 [file 14456345]

## **Supporting Information**

### **K atom promotion of O<sub>2</sub> chemisorption on Au(111) Surface**

Jindong Ren<sup>1</sup>, Yanan Wang<sup>2,3</sup>, Jin Zhao<sup>\*1,2,3</sup>, Shijing Tan<sup>1</sup> and Hrvoje Petek<sup>\*1</sup>

<sup>1</sup> *Department of Physics and Astronomy and Pittsburgh Quantum Institute, University of Pittsburgh, Pittsburgh, Pennsylvania 15260, USA*

<sup>2</sup>*Hefei National Laboratory for Physical Sciences at Microscale and Department of Physics, University of Science and Technology of China, Hefei, Anhui 230026, China*

<sup>3</sup>*Hefei National Laboratory for Physical Sciences at Microscale, CAS Key Laboratory of Materials for Energy Conversion and Department of Materials Science and Engineering, University of Science and Technology of China (USTC), Hefei, Anhui 230026, P. R. China*

\*e-mail: petek@pitt.edu, zhaojin@ustc.edu.cn

### **Contents:**

- I.  $dI/dV$  spectra of clean Au(111) and K/Au(111)
- II. Estimation of the number of K atoms within in each triangular island
- III. O<sub>2</sub> dosing and temperature dependence measurements
- IV. Charge redistribution analysis

## I. $dI/dV$ spectra of clean Au(111) and K/Au(111)

Figure S1 shows the typical spectra performed on Au(111) and K/Au(111) surfaces. The sharp step-shaped onset of Au(111) surface state at -0.48 V can be clearly seen in the black line. Unlike the symmetric peaks with respect to the Fermi energy taken of K<sub>2</sub>O<sub>2</sub> dots, the spectrum taken of K/Au(111) surface is featureless.

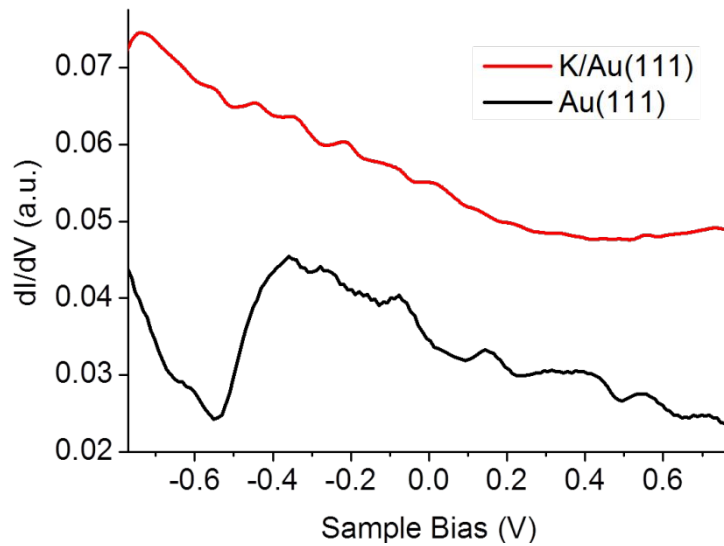

**Figure S1 .**  $dI/dV$  spectra measured on Au(111) (black line) and K/Au(111) (red line). The red curves have been shifted vertically for clarity,  $T = 4.5$  K, tunnelling parameters:  $I = -0.1$  nA,  $V_b = -0.4$  V.

## II. Estimation of the number of K atoms within in each triangular island

Figure S2b is a topographic image of O-K/Au(111) surface after dosing of O<sub>2</sub> on intermediate K coverage sample. To estimate the precisely the number of K atoms contained in each triangular island, we perform a statistical analysis of the number of K atoms before the O<sub>2</sub> dosing and the K<sub>2</sub>O<sub>2</sub> dots and K-O<sub>2</sub> triangular islands (after the dosing process) based on counting several thousands of atoms/clusters in 30 × 30 nm STM images (Figure S2d). Based on such counting, assuming that each K<sub>2</sub>O<sub>2</sub> dot has taken two K atoms, to account for all of the initially present K atoms we conclude that each triangular island should on average contain ten K atoms. According to DFT calculations, stable K-O<sub>2</sub> structure containing ten K atoms, and forming stable equilateral triangle structures with 1.6 nm sides is superimposed on the image of a triangular island in Figure S2c.

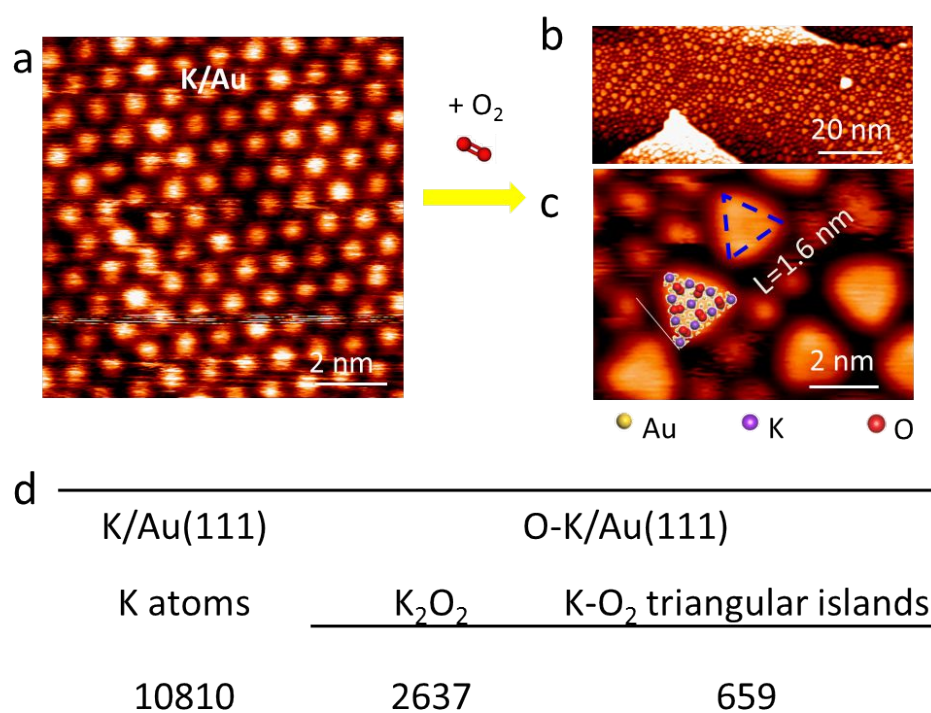

**Figure S2.** (a) STM image of K atoms on Au (111) before dosing of O<sub>2</sub>. (b) Large scale STM image of O-K/Au surface after exposing (a) to oxygen. (c) The most probable K-O<sub>2</sub> triangle structure calculated by DFT that accounts for the K atom number and triangle geometry and size is displayed. (d) Estimated distribution of K before and after O<sub>2</sub> dosing.

### III. O<sub>2</sub> dosing and temperature dependence measurements

We also tested the effect of further dosing of O<sub>2</sub> molecules on K-O<sub>2</sub> sample. We first recorded an image after the initial O<sub>2</sub> dosing, then retracted STM tip far away from the sample surface so that the tip does not affect the local O<sub>2</sub> adsorption. After dosing of additional 1 L of O<sub>2</sub> molecules the structure the distribution of K-O<sub>2</sub> complexes did not change when rescanning the same area in [Figure S3a](#) and [S3b](#).

Moreover, to determine the stability of K<sub>2</sub>O<sub>2</sub> complex, we warm the surface to 120 K and cool it back to 4.5 K. The temperature cycling does not change the K-O<sub>2</sub> complex distribution. Overall statistics of K-O<sub>2</sub> dot and island numbers based on several thousand elements are also made. The number density ratios between K-O<sub>2</sub> dots and triangles are nearly same before and after temperature cycling (see [Figure S3f](#)), indicating that the K-O<sub>2</sub> complexes are stable with respect to the O<sub>2</sub> molecule desorption or dissociation up to 120 K.

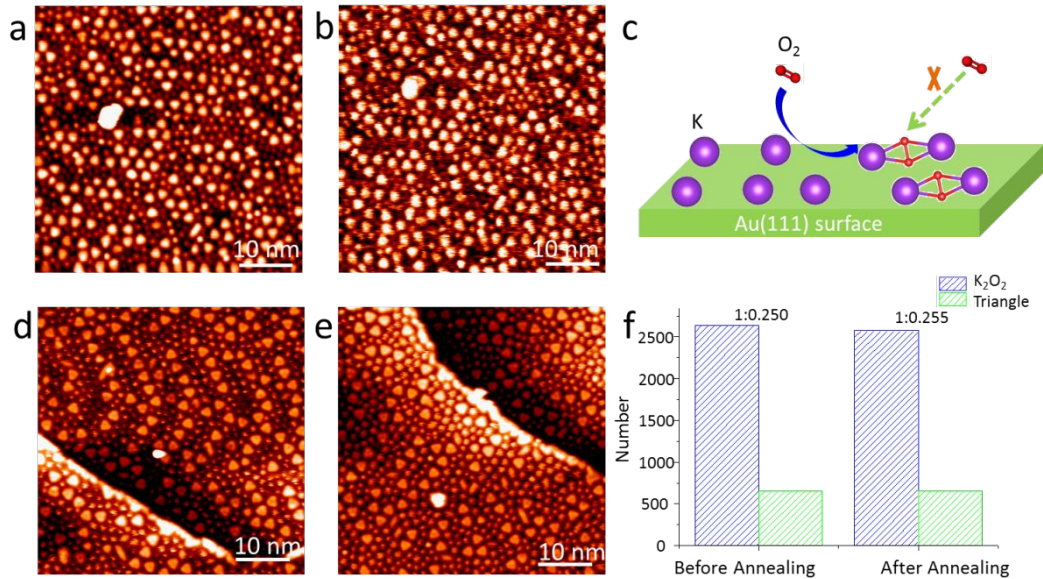

**Figure S3.** (a) Before O<sub>2</sub> dosing, and (b) After O<sub>2</sub> dosing. After the initial O<sub>2</sub> dose, there is no further O<sub>2</sub> adsorption and K-O<sub>2</sub> complexes remain unchanged. (c) Schematic diagram of O<sub>2</sub> capture by bare K atoms to form K<sub>2</sub>O<sub>2</sub> dots. After all of K atoms are captured by K-O<sub>2</sub> complexes, no further O<sub>2</sub> adsorption occurs. (d)-(f) Statistical distribution of K-O<sub>2</sub> dots and triangle islands after cycling to different temperatures. (d) Initial image before the cycling process where O<sub>2</sub> is adsorbed at 4.5 K. (e) STM image of K-O<sub>2</sub> complexes after cycling the sample to ~120 K and back to 4.5 K to record the image; (f) the ratios of K-O<sub>2</sub> dots to triangle islands before and after temperature cycling process are 0.250 and 0.255, i.e., they are unchanged within the counting statistics of measurements.

#### IV. Charge redistribution analysis

To understand more details of the nature of  $O_2$  in the  $K_2O_2$  on Au(111) surface. The charge redistribution on  $O_2$  before and after forming  $K_2O_2$  on Au(111) surface is shown in Figure S4. It is calculated as  $\rho(O_2) + \rho(Au+K_2) - \rho(Au+K_2O_2)$ . It can be seen that the dominant electron transfer is from the Au surface (where the two K atoms have already transferred their electrons to Au) to the  $O_2 \pi^*$  orbital. In addition, there is also charge transfer from the  $\sigma$  to the  $O_2 \pi^*$  orbital of  $O_2$ , which lengthens the O–O bond and affects its stretching frequency

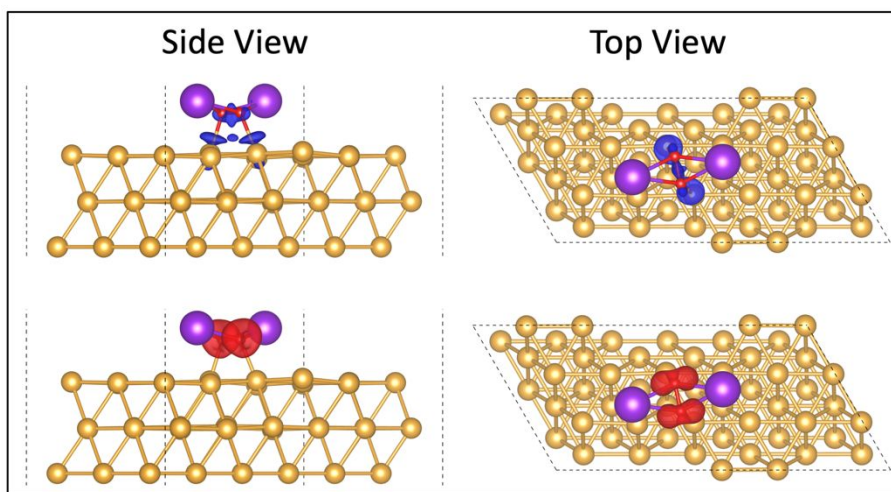

**Figure S4.** Side and top views of charge redistribution on  $O_2$  before (top) and after forming  $K_2O_2$  on Au(111) surface (bottom). The blue area is electron density loss, while the red is electron density gain.
